# Supplementary material for: Differences between Adiposity Indicators for Predicting All-Cause Mortality in a Representative Sample of United States Non-Elderly Adults
Source: PLoS One. 2012 Nov 30;7(11):e50428. doi: 10.1371/journal.pone.0050428 (PMC3511554; doi:10.1371/journal.pone.0050428)
Supplement: Appendix S1 — Population-based cross-tabulations of the 6 participating adiposity indicators displaying the concordances (in bold) of assignments to adiposity quartile 1, midrange, and quartile 4. (XLSX) [file pone.0050428.s001.xlsx]

## Sheet: APPENDIX
APPENDIX. Population-based cross-tabulations of the 6 participating adiposity indicators displaying the concordances (in bold) of assignments to adiposity quartile 1, midrange, and quartile 4.
Each cell expresses the estimated population percentage of men (above diagonal) or women (below diagonal), and each cross-tabulation sums to 100 percent.
Adiposity Indicator		Body Mass Index			Waist Circumference			Waist-Height Ratio			Waist-Hip Ratio			Waist-Thigh Ratio			Lipid Accum. Product
		Qrtl 1	Mid-range	Qrtl 4	Qrtl 1	Mid-range	Qrtl 4	Qrtl 1	Mid-range	Qrtl 4	Qrtl 1	Mid-range	Qrtl 4	Qrtl 1	Mid-range	Qrtl 4	Qrtl 1	Mid-range	Qrtl 4
Body Mass Index	Quartile 1				19	6	0	19.7	5.3	0	11.5	12.6	0.9	10.6	12	2.3	16.5	7.2	0.5
	Midrange				5.6	39.3	5.1	5.9	40.1	3.9	7.7	29.8	12.5	12.3	26.1	11.5	8	32.8	9.5
	Quartile 4				0	4.7	20.3	0	5	20.1	0.7	9.5	14.8	2.6	10.8	11.7	0.2	10.2	15.2
Waist Circumference	Quartile 1	17.8	7	0				21	3.6	0	14.8	9.7	0.1	14.7	9.4	0.5	19	6.4	0.1
	Midrange	7.2	38.4	4.4				4.6	42.1	3.3	4.9	34.7	10.4	9.9	30.1	10.1	5.6	33.8	9.2
	Quartile 4	0	4.6	20.7				0	4.6	20.7	0.2	7.4	17.7	0.9	9.5	15	0.2	9.9	15.9
Waist-Height Ratio	Quartile 1	18.8	8	0	22	4.8	0				16	9.6	0	15.3	9.7	0.6	19.1	7.2	0.3
	Midrange	6.2	37.3	4.1	2.8	42.5	2.3				3.7	36	10.6	9.5	30.3	10.4	5.5	33.6	10.1
	Quartile 4	0	4.6	21	0	2.6	23				0.2	6.2	17.5	0.7	8.8	14.5	0.2	9.2	14.7
Waist-Hip Ratio	Quartile 1	9.8	11.1	1.6	14.8	7.5	0.3	15.8	6.4	0.3				15.3	4.5	0.1	14.3	6.1	0.2
	Midrange	13.6	25.8	9.9	9.8	31.6	7.9	10.9	30.5	8				10	35.3	6.5	9.9	32.2	9.2
	Quartile 4	1.5	13.1	13.5	0.2	10.8	17.1	0.1	10.7	17.3				0.1	9.1	19	0.6	11.8	15.7
Waist-Thigh Ratio	Quartile 1	8.3	13.1	3.2	13.3	10	1.3	14.3	8.9	1.4	16.8	7.7	0				14	11.3	1.2
	Midrange	14.1	25.5	10.7	10.9	30.2	9.3	11.9	29	9.5	5.6	36.1	8.7				9.9	26.6	11.2
	Quartile 4	2.6	11.3	11.1	0.6	9.7	14.7	0.6	9.7	14.7	0.1	5.6	19.4				0.8	12.2	12.7
Lipid Accum. Product	Quartile 1	15.4	9.4	0.1	18.7	6.2	0	19	5.9	0.1	14.2	10.4	0.3	14	10.3	0.5
	Midrange	8.4	33.7	8	6.1	36.4	7.6	8.3	34.2	7.7	9	29.4	11.7	11.1	28.5	10.5
	Quartile 4	0.5	7.9	16.7	0.1	7.6	17.4	0.1	7.1	17.8	0.7	8.5	15.8	1.4	10.3	13.3
